# Supplementary material for: FLTX2: A Novel Tamoxifen Derivative Endowed with Antiestrogenic, Fluorescent, and Photosensitizer Properties
Source: MDPI journal article supplement (doi:10.3390/ijms22105339), 2021-05-19

Supplementary Figure S1.  $^1\text{H}$  NMR spectra of compound **2**.

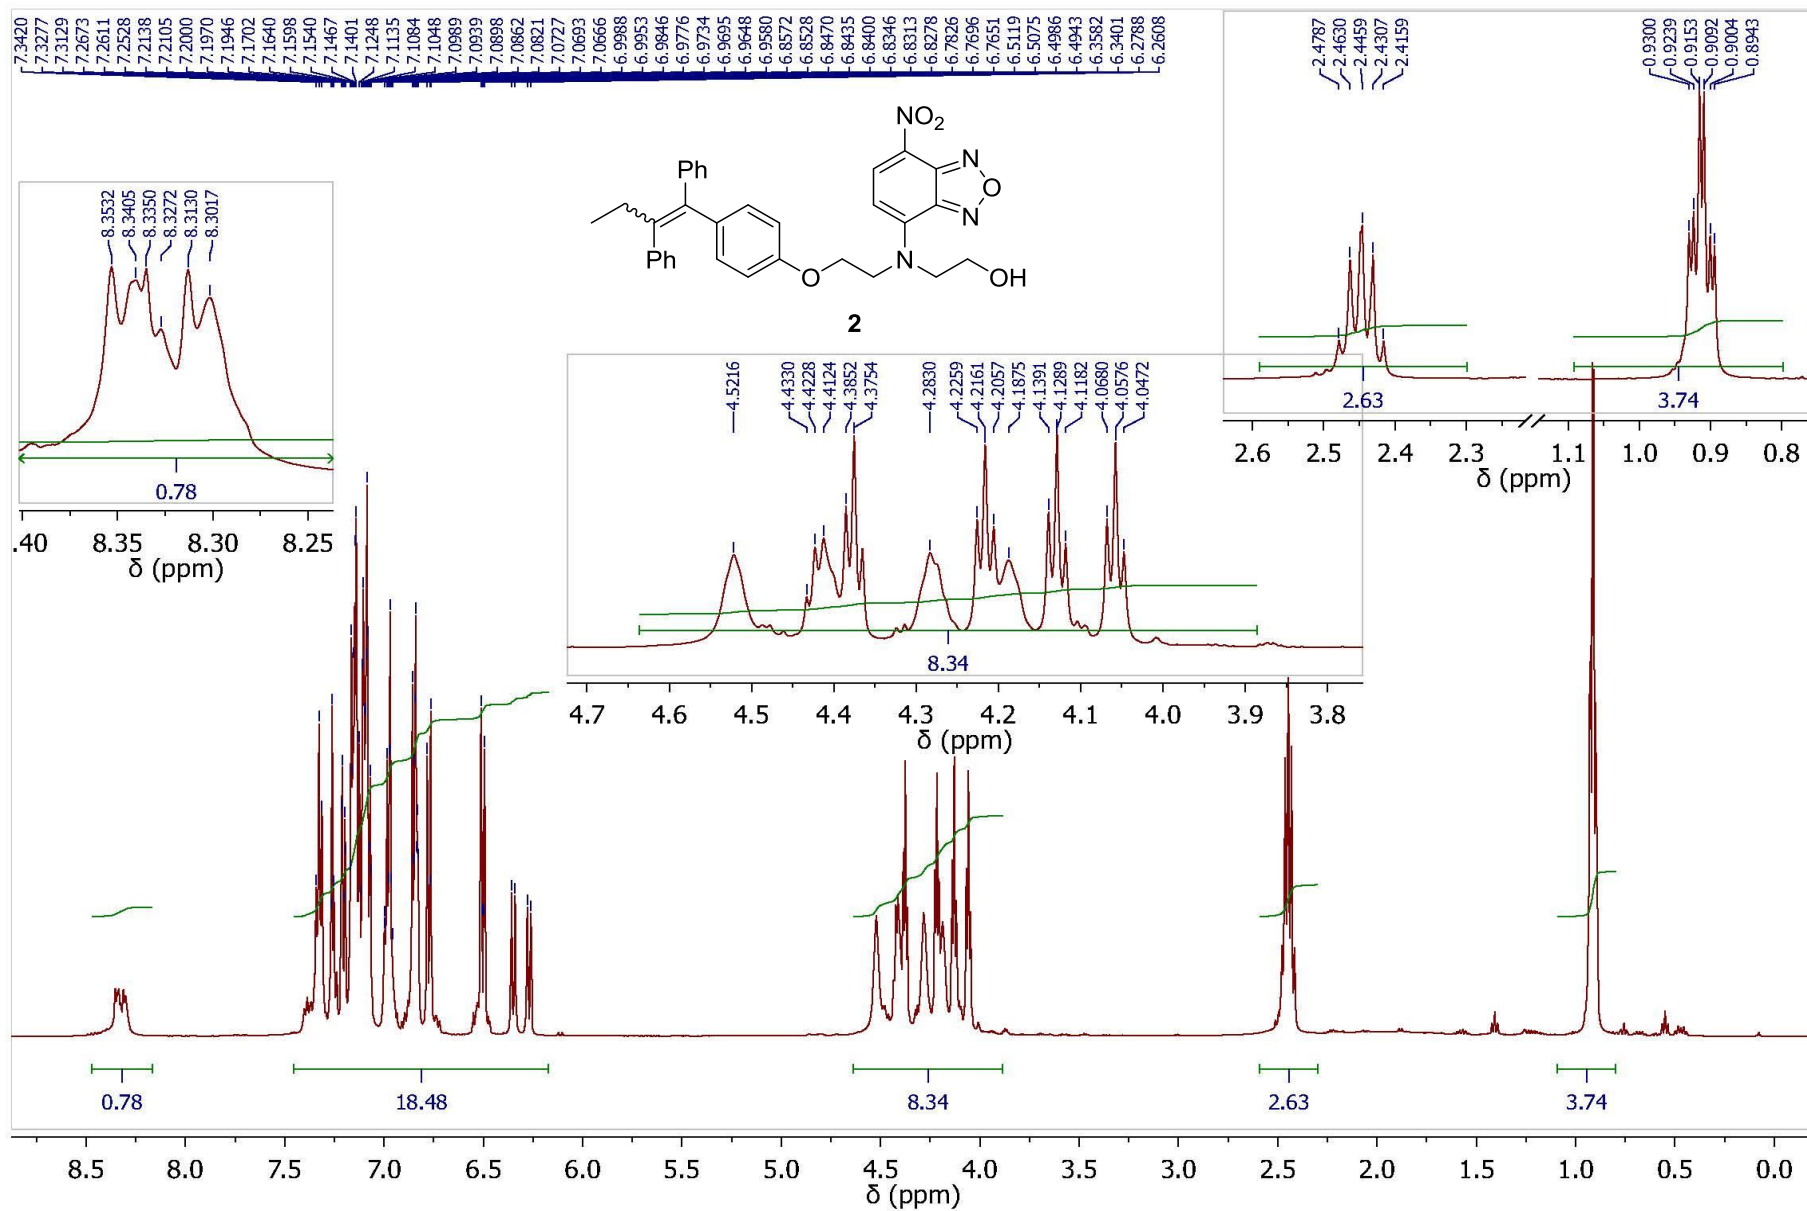

Supplementary Figure S2.  $^{13}\text{C}$  NMR spectra of compound **2**.

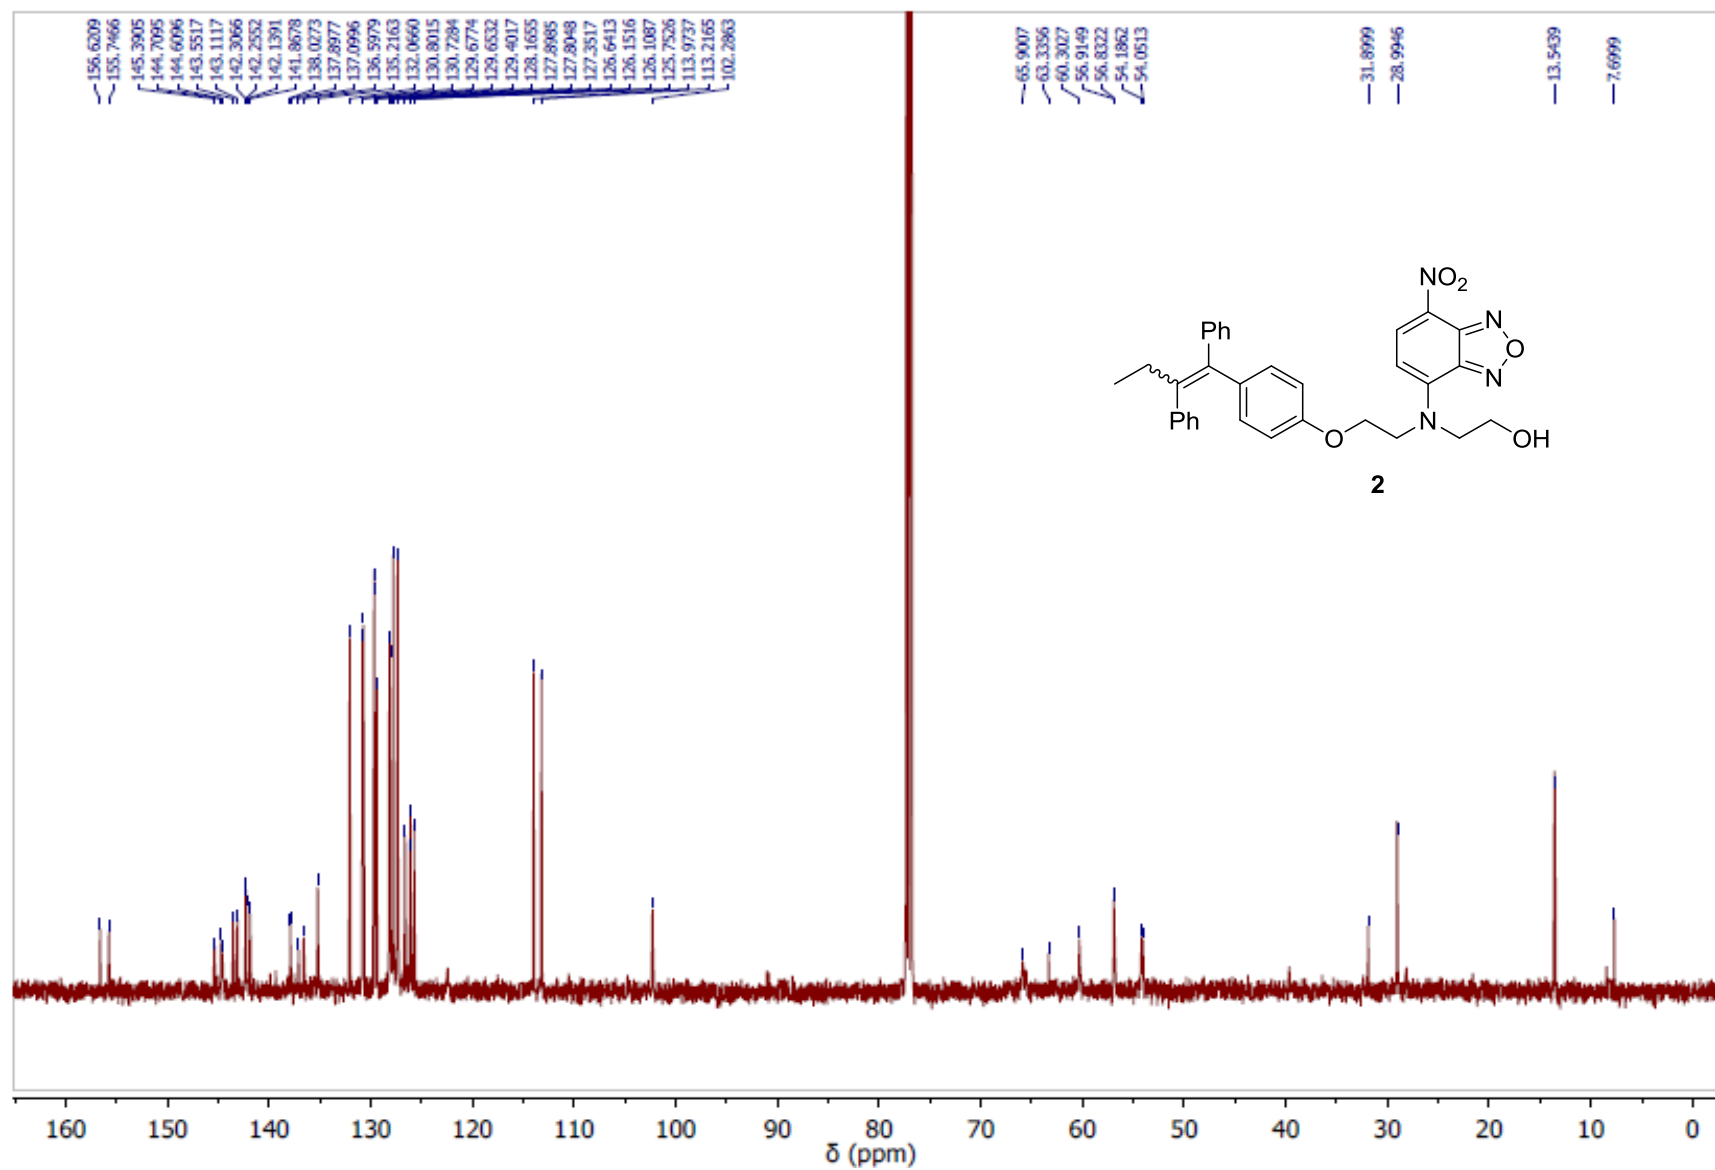

Supplementary Figure S3.  $^1\text{H}$  NMR spectra of compound **3**.

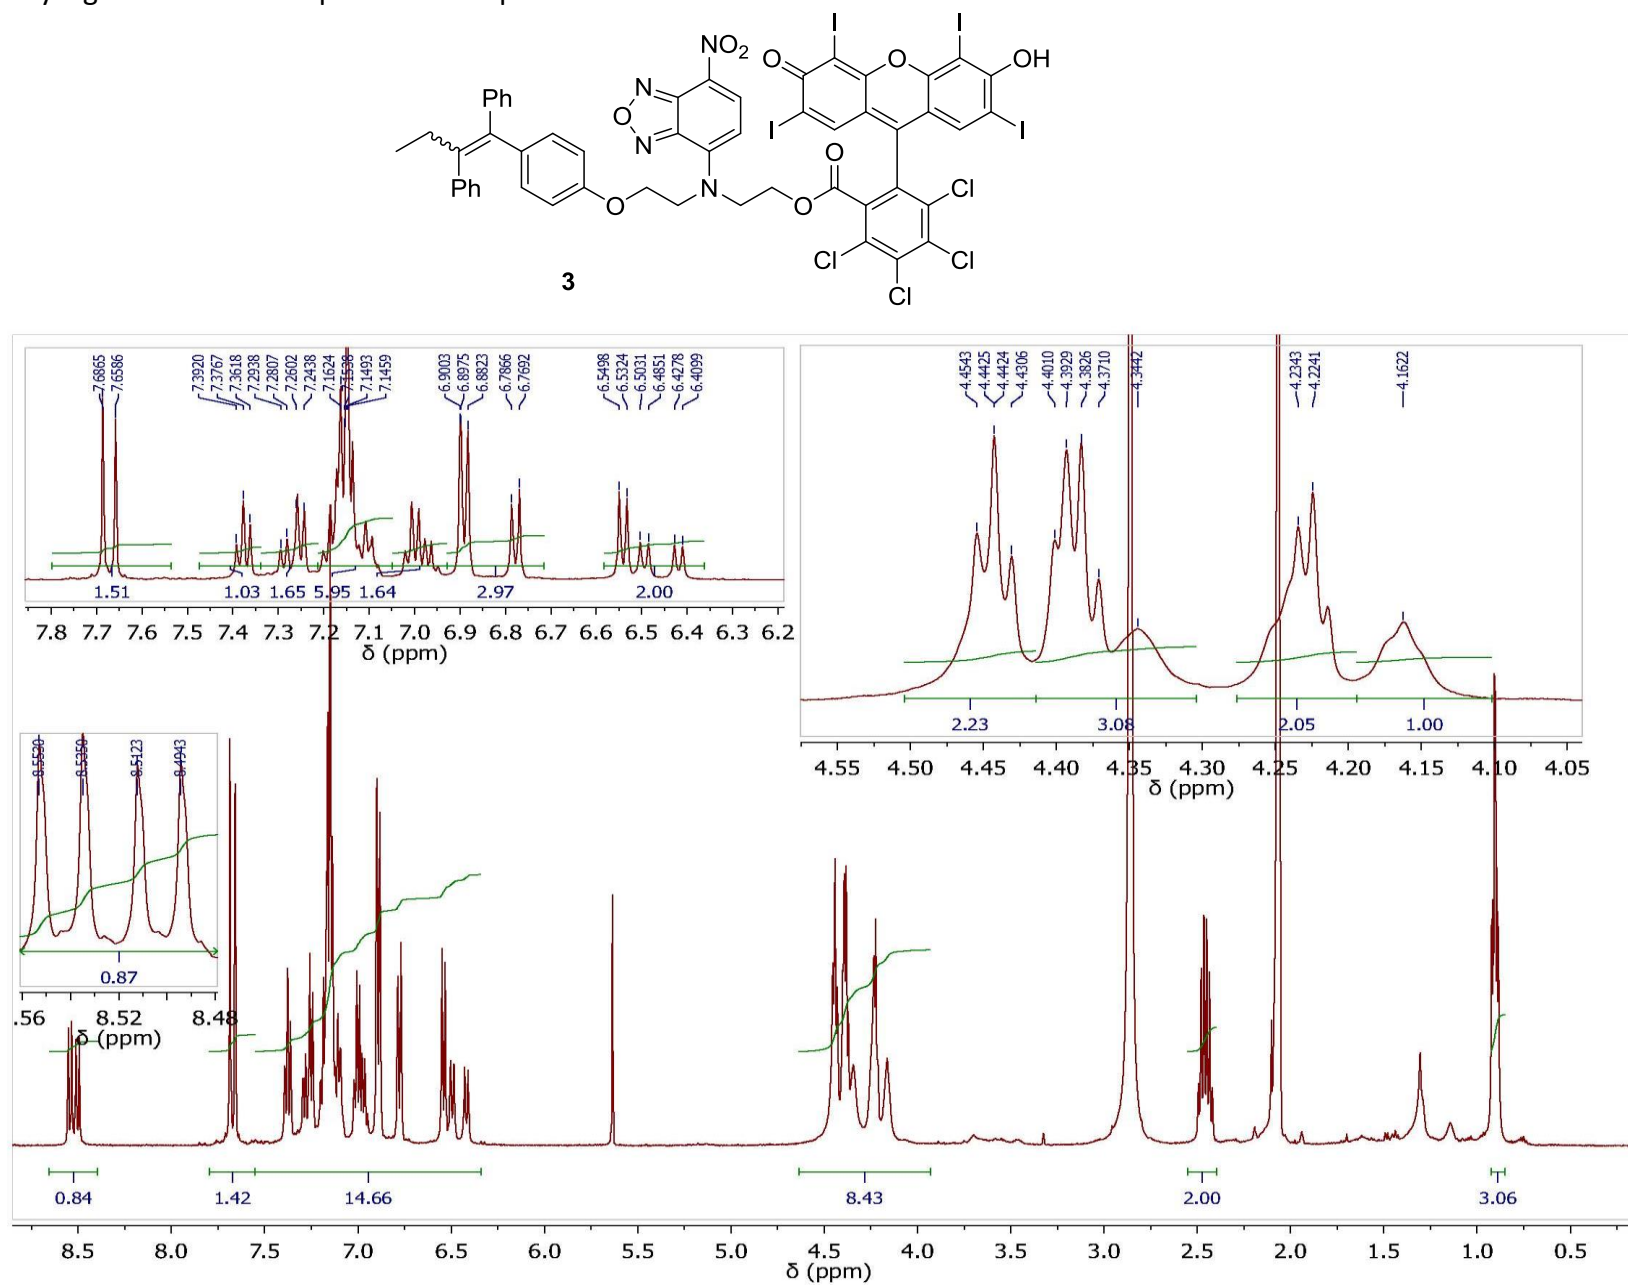

Supplementary Figure S4.  $^{13}\text{C}$  NMR spectra of compound **3**.

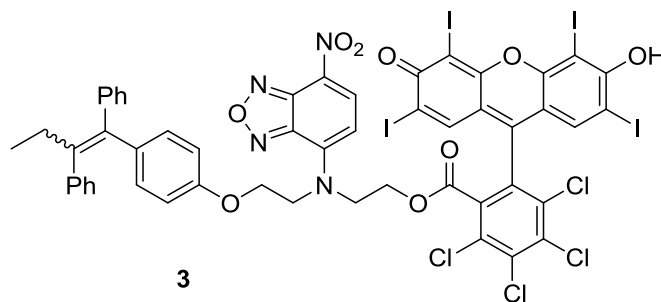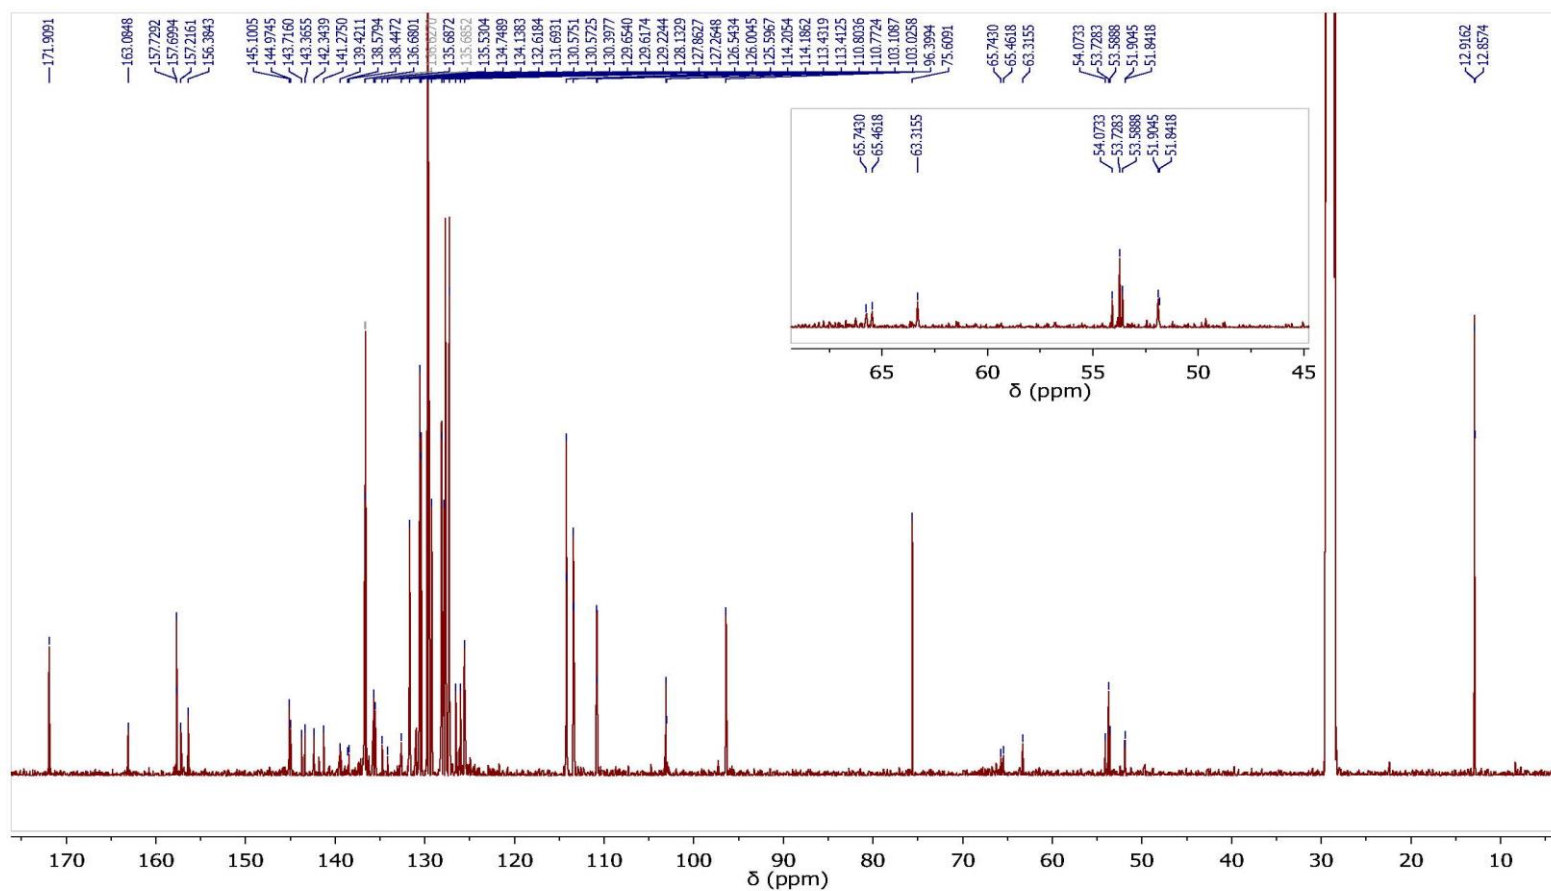

Supplementary Figure S5. DEPT

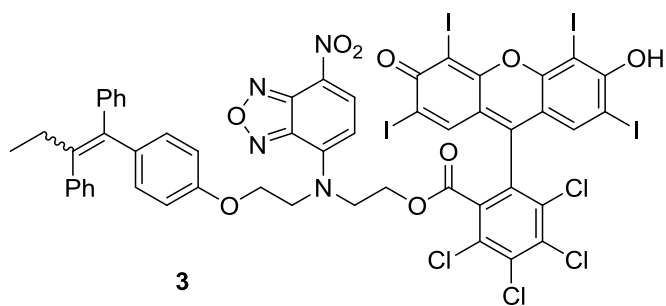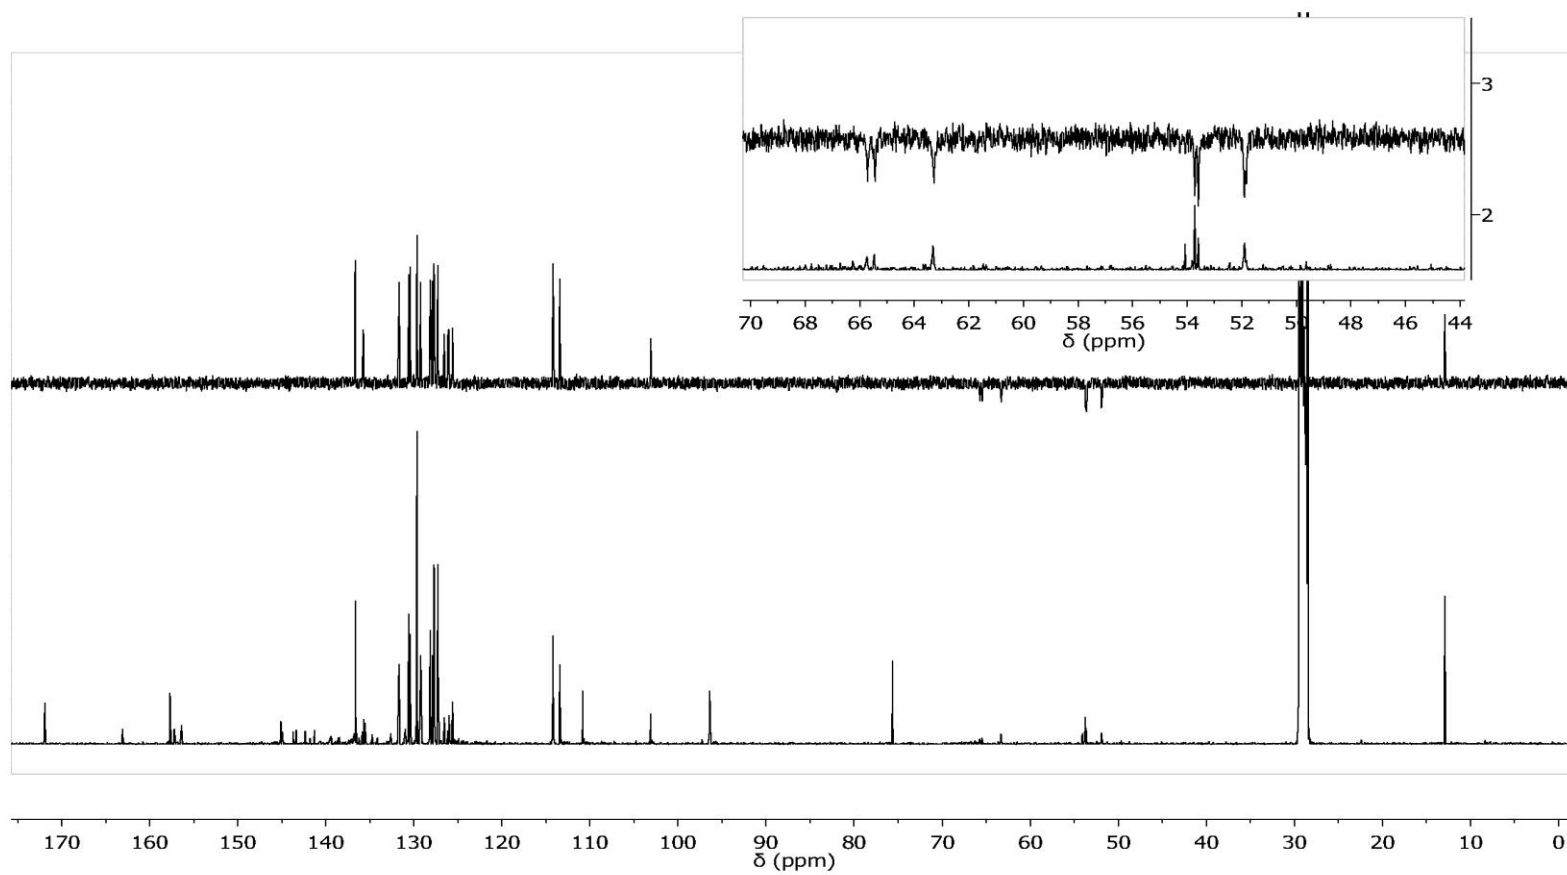

Supplementary Figure S6. HSQC

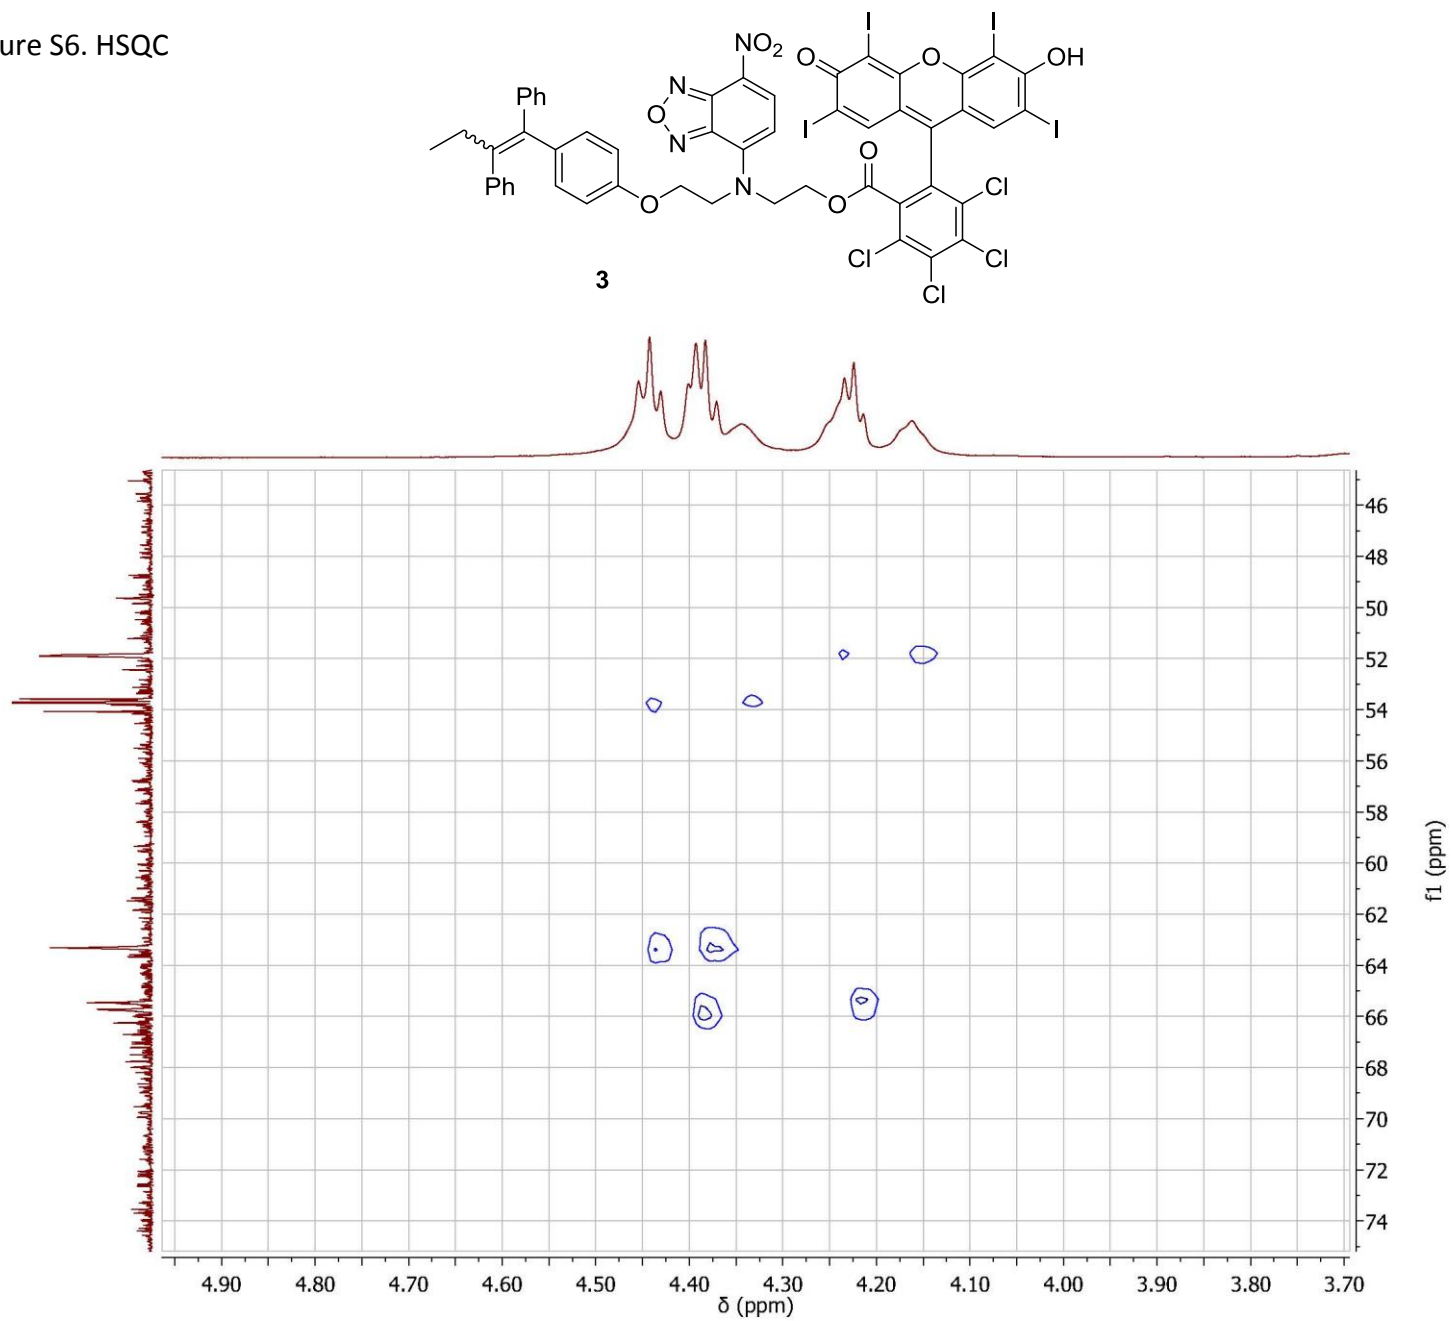

Supplementary Figure S7. Molecular Dynamics study for FLTXX2 on the human ER $\alpha$  LBD: Interactions diagram.

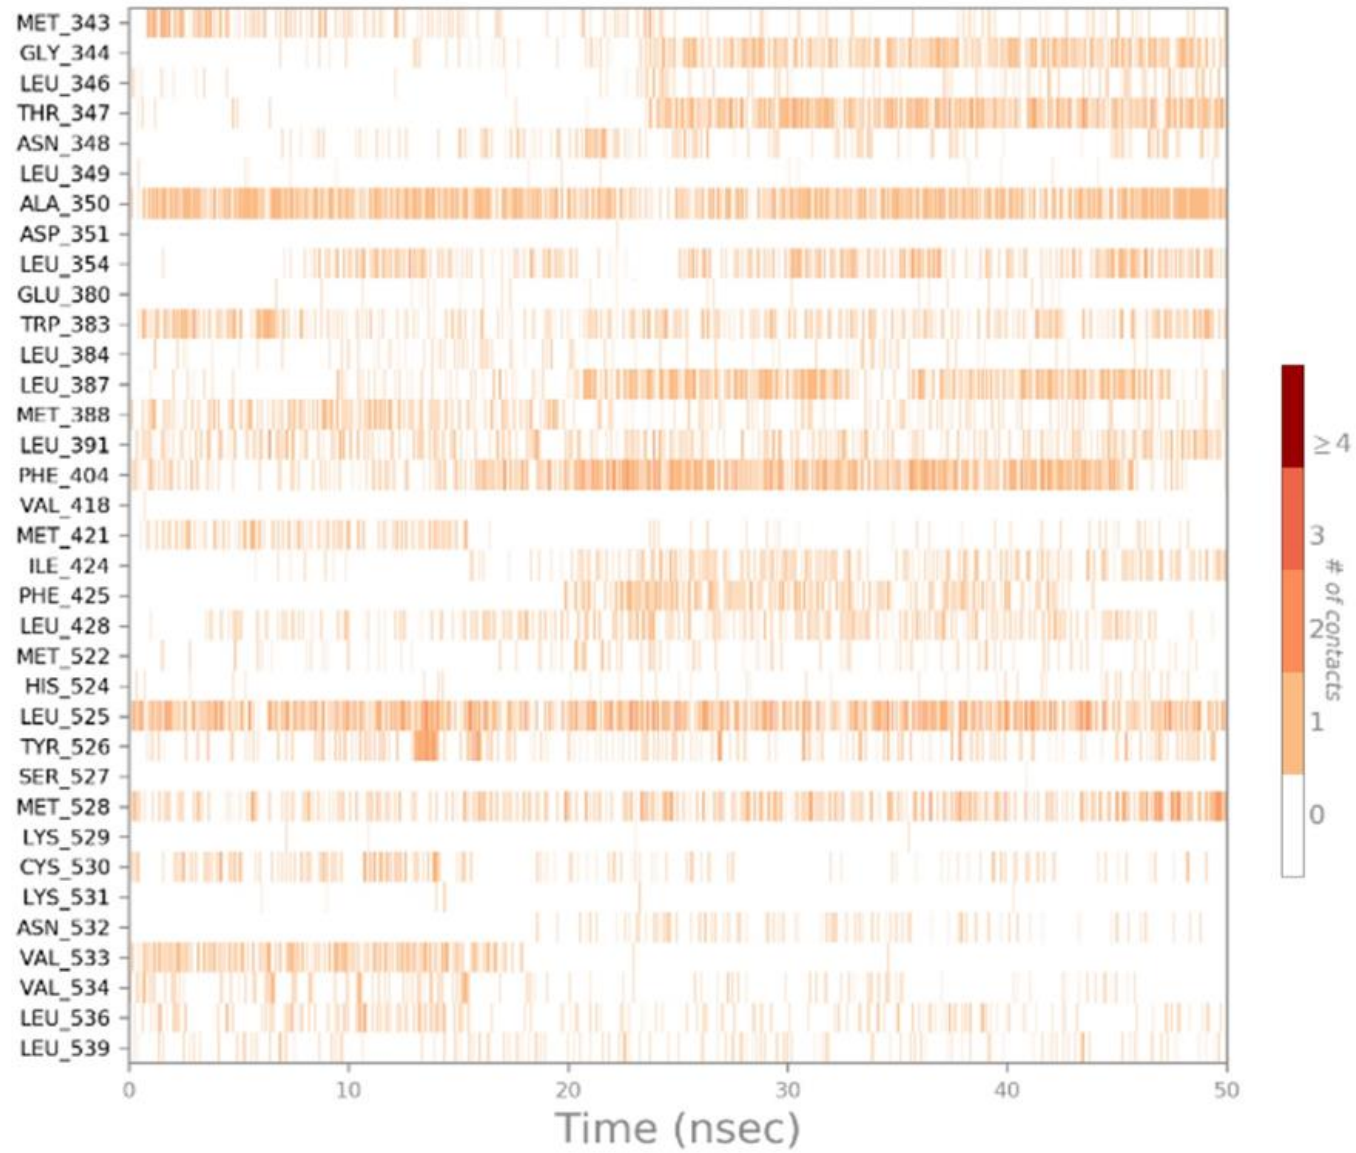

Supplement: s1 [file s1]
